# Supplementary material for: Development of Blue Phosphorescent Pt(II) Materials Using Dibenzofuranyl Imidazole Ligands and Their Application in Organic Light-Emitting Diodes
Source: MDPI journal article supplement (doi:10.3390/ma16114159), 2023-06-02
Supplement: s1 [file s1]

# Development of Blue Phosphorescent Pt(II) Materials Using Dibenzofuranyl Imidazole Ligands and Their Application in Organic Light-Emitting Diodes

Hakjo Kim <sup>1</sup>, Dain Cho <sup>1</sup>, Haein Kim <sup>1</sup>, Seung Chan Kim <sup>2</sup>, Jun Yeob Lee <sup>2,\*</sup> and Youngjin Kang <sup>1,\*</sup>

<sup>1</sup> Division of Science Education, Kangwon National University, Chuncheon 24341, Republic of Korea; tank528@naver.com (H.K.); dain0041@naver.com (D.C.); godls0126@naver.com (H.K.)

<sup>2</sup> School of Chemical Engineering, Sungkyunkwan University, 2066 Seobu-ro, Jangan-gu, Suwon 16419, Republic of Korea; ksc9650@naver.com

\* Correspondence: leej17@skku.edu (J.Y.L.); kangy@kangwon.ac.kr (Y.K.)

## Contents

- Experimental details.
- **Figure S1.** <sup>1</sup>H NMR of **1** in CD<sub>2</sub>Cl<sub>2</sub>.
- **Figure S2.** <sup>13</sup>C NMR of **1** in CD<sub>2</sub>Cl<sub>2</sub>.
- **Figure S3.** <sup>1</sup>H NMR of **2** in CD<sub>2</sub>Cl<sub>2</sub>.
- **Figure S4.** <sup>13</sup>C NMR of **2** in CD<sub>2</sub>Cl<sub>2</sub>.
- **Figure S5.** X-ray structure of **2** using Diamond program.
- **Figure S6.** Decay curve of **1**.
- **Figure S7.** Decay curve of **2** at different wavelength (black: 482nm, red:435nm).
- **Figure S8.** Oxidation of **1** and **2** (inset: Fc/Fc<sup>+</sup> oxidation).
- **Figure S9.** Expanded <sup>3</sup>MLCT absorption band of **1** and **2** at 460 nm ~ 480nm.
- **Table S1.** Crystal Data and Structure Refinement for **2**.
- **Table S2.** Atomic coordinates ( $\times 10^4$ ) and equivalent isotropic displacement parameters ( $\text{\AA}^2 \times 10^3$ ) for **2**. U(eq) is defined as one third of the trace of the orthogonalized U<sup>ij</sup> tensor.
- **Table S3.** Bond lengths [ $\text{\AA}$ ] and angles [ $^\circ$ ] for **2**.
- **Table S4.** Anisotropic displacement parameters ( $\text{\AA}^2 \times 10^3$ ) for **2**. The anisotropic displacement factor exponent takes the form:  $-2 \left[ h^2 a^{*2} U^{11} + \dots + 2 h k a^* b^* U^{12} \right]$
- **Table S5.** Hydrogen coordinates ( $\times 10^4$ ) and isotropic displacement parameters

(Å<sup>2</sup> × 10<sup>3</sup>) for **2**.

- **Table S6.** Hydrogen bonds for **2** [Å and °].
- **Table S7.** TD-DFT calculation results of **1** and **2**.
- **Table S8.** PHOLEDs data of **1**-based devices at different doping levels.

## Experimental Details

### 2.1. General Consideration

All experiments were performed under N<sub>2</sub> atmosphere using standard Schlenk technique. Solvents used were dried over suitable drying agents prior to use. All starting materials were commercially purchased and used without further purification. The spectra of NMR were recorded on a 400 or 600 MHz JEOL or Bruker FT-NMR spectrometer. The absorption and emission spectra were obtained using UV/Vis spectrometer Shimadzu UV-1601 and Perkin Elmer Luminescence spectrometer LS 50B, respectively. The transient PL decay curve and absolute PL quantum yield were measured using Quantaaurus-Tau system (Hamamatsu, C11367-31) and Quantaaurus-QY system (Hamamatsu, C11347-11) under N<sub>2</sub> atmosphere, respectively. All solvents for measuring photophysical properties were degassed with nitrogen before use.

### 2.2. X-ray crystallographic analysis

X-ray diffraction data for complex **2** were collected at 173(2) K on a Bruker SMART APEX II ULTRA diffractometer equipped with a graphite monochromated Mo K $\alpha$  ( $\lambda$ = 0.71073 Å) radiation generated by a rotating anode and a CCD detector. The cell parameters for the compound were obtained from a least-squares refinement of the spots (from 36 collected frames). Data collection, data reduction, and semi-empirical absorption correction (SADABS) were carried out using the software package of APEX2. All of the calculations for the structure determination were carried out using the APEX2 package with the SHELXS-2014 and SHELXL-2014 programs. The non-hydrogen atoms of both compounds were refined anisotropically. All hydrogen atoms were placed in calculated positions and refined isotropically in a riding manner along with their respective parent atoms. The figure was prepared using Diamond program. A summary of the refinement details and resulting factors for the crystal structures of **2** are given in Table S1. CCDC-2259034 contains the supplementary crystallographic data for this paper. These data can be obtained free of charge from The Cambridge Crystallographic Data Centre via [www.ccdc.cam.ac.uk/data\\_request/cif](http://www.ccdc.cam.ac.uk/data_request/cif).

### 2.3. Device Fabrication and Measurement

The compound **1** phosphor was evaluated by doping in the mixed host, 3,3'-di(9H-carbazol-9-yl)-1,1'-biphenyl(mCBP)/ 9-(3'-Carbazol-9-yl-5-cyano-biphenyl-3-yl) -9H-carbazole-3-carbonitrile (CNmCBP CN) at 3 and 10% using the device configuration of indium tin oxide (50 nm) /poly(3,4-ethylenedioxythiophene) (PEDOT, 40 nm)/4,4'-cyclohexylidenebis[*N,N*-bis(4-methylphenyl)benzene amine] (TAPC, 10 nm) / 1,3-bis(*N*-carbazolyl)benzene (mCP, 10 nm) / mCBP:CNmCBPCN dopant (25 nm) / diphenyl[4-(triphenylsilyl)phenyl]phosphine oxide (TSPO1, 5 nm) / 1,3,5-tris (1-phenyl -1*H*-benzo[*d*]imidazol-2-yl)benzene (TPBi, 20 nm) / LiF (1.5 nm) / Al (200 nm).

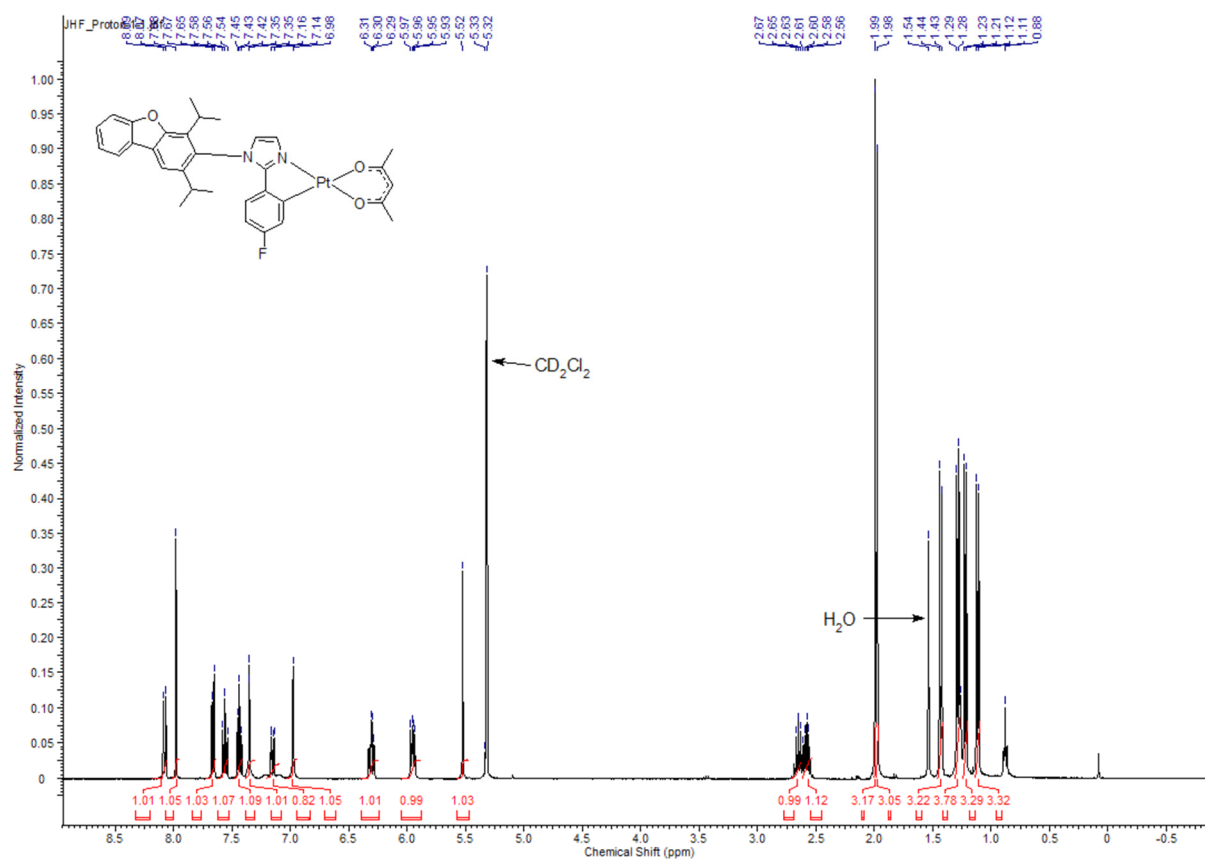

**Figure S1.** <sup>1</sup>H NMR of **1** in CD<sub>2</sub>Cl<sub>2</sub>.

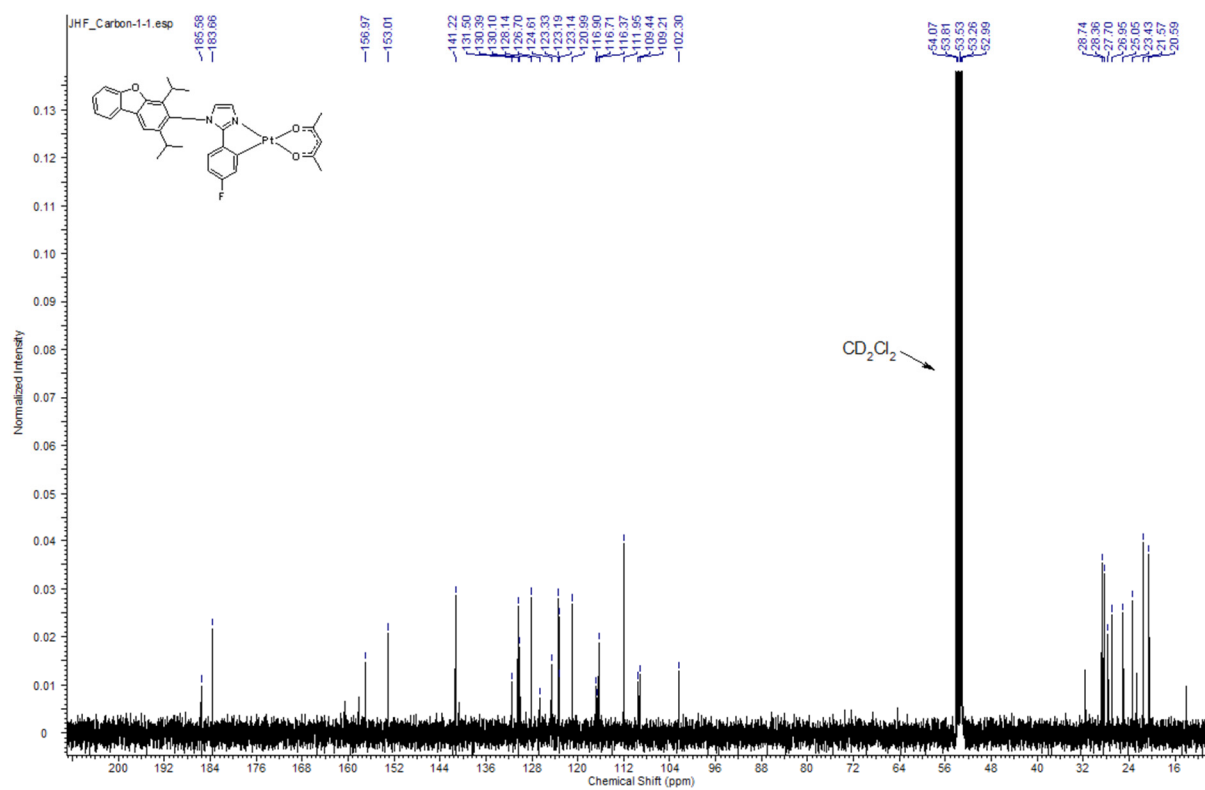

**Figure S2.**  $^{13}\text{C}$  NMR of **1** in  $\text{CD}_2\text{Cl}_2$ .

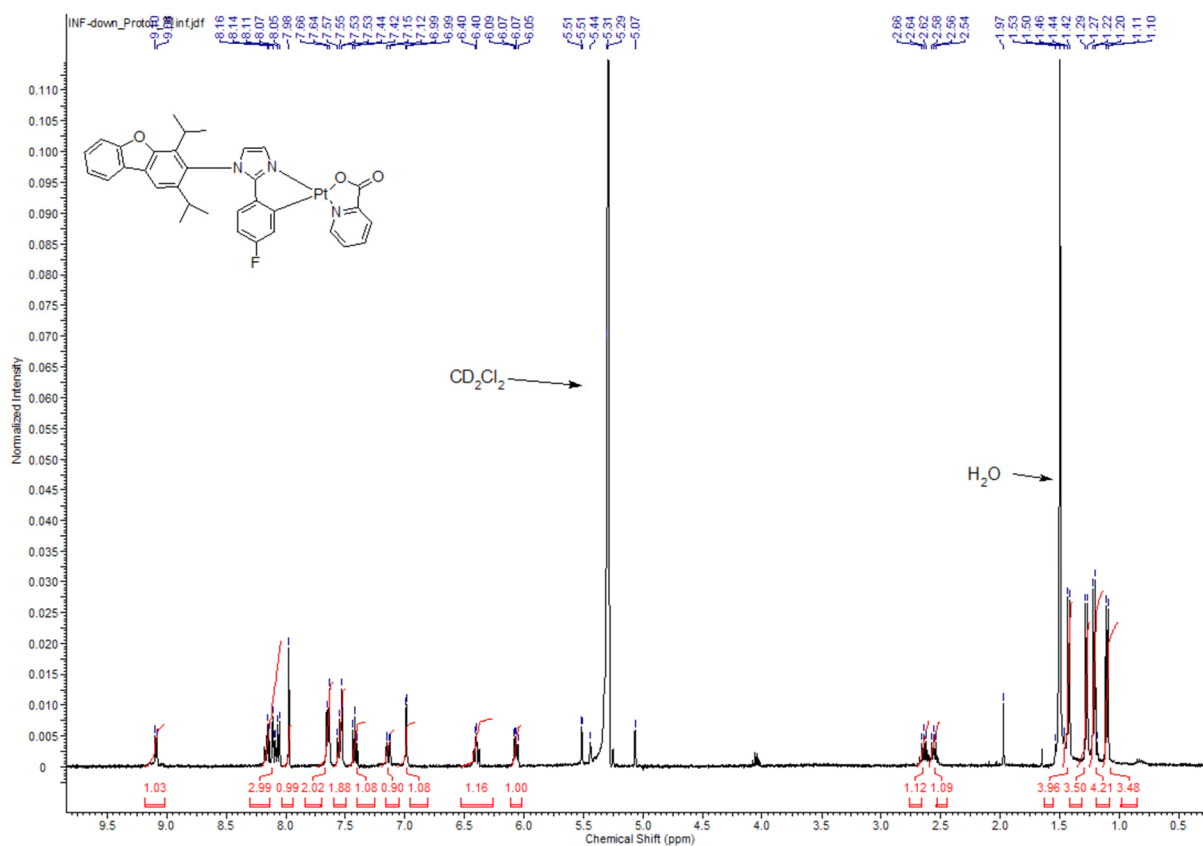

**Figure S3.**  $^1\text{H}$  NMR of **2** in  $\text{CD}_2\text{Cl}_2$ .

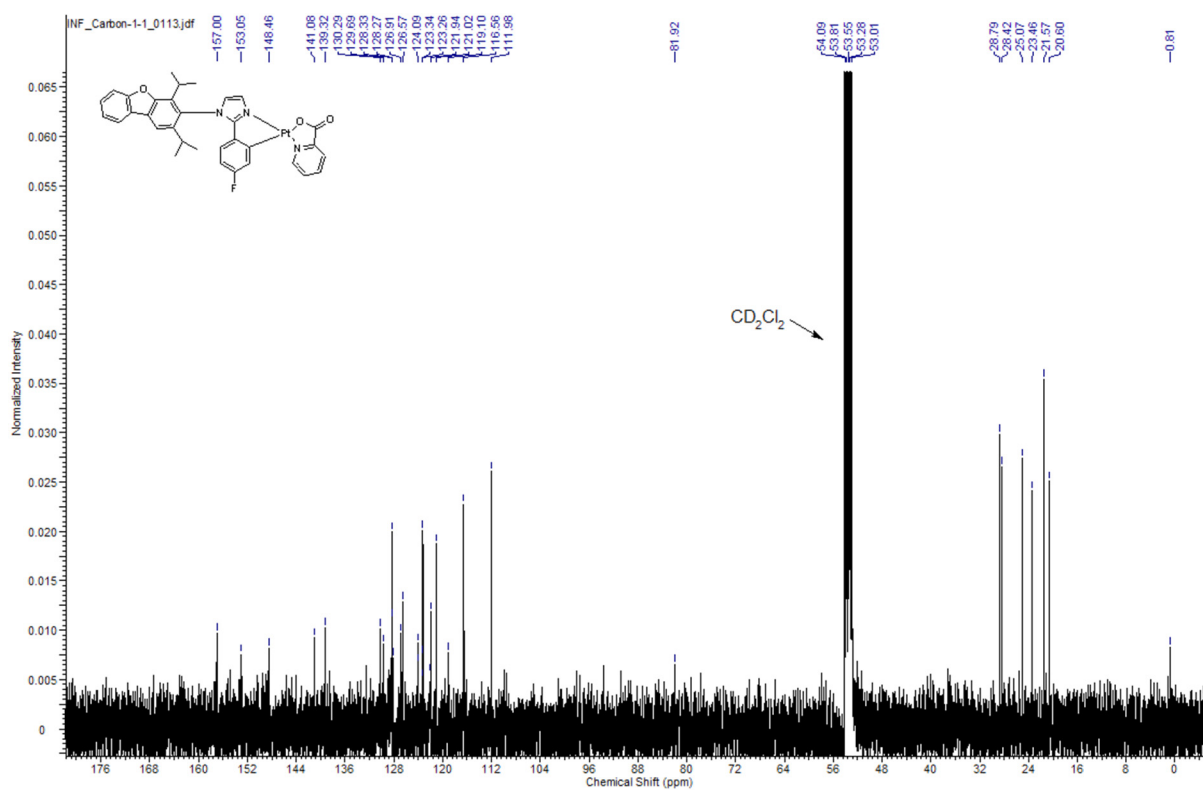

**Figure S4.**  $^{13}\text{C}$  NMR of **3** in  $\text{CD}_2\text{Cl}_2$ .

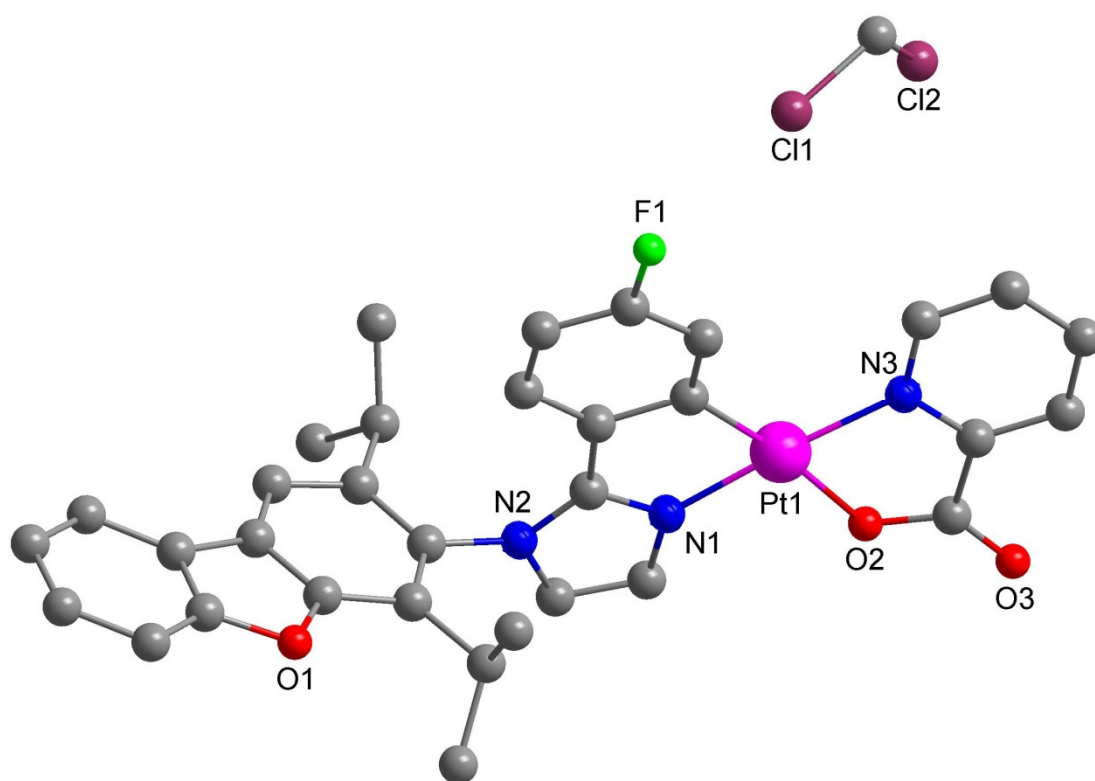

**Figure S5.** X-ray structure of **2** using Diamond program.

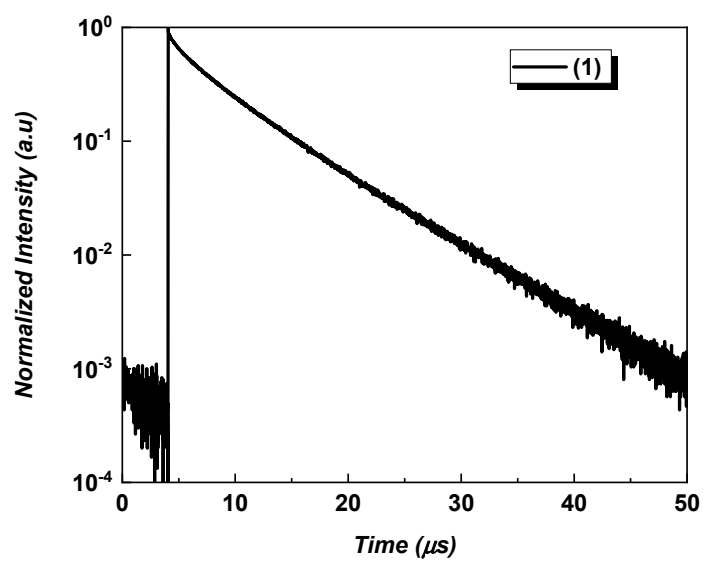

Figure S6. Decay curve of 1.

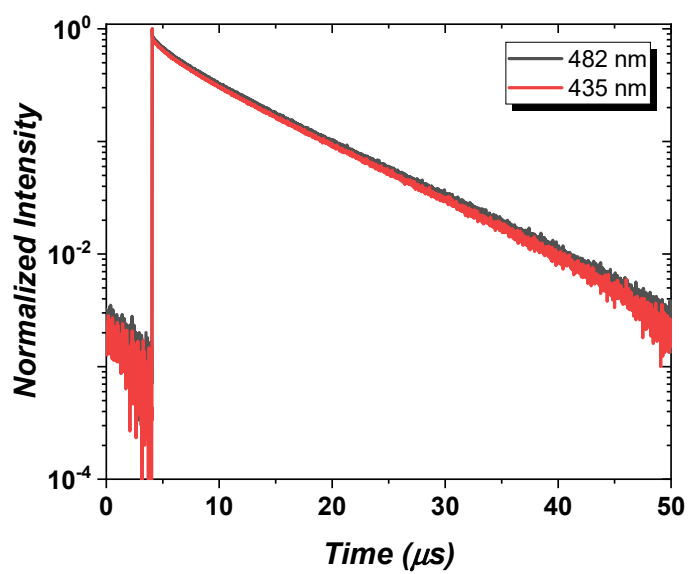

Figure S7. Decay curve of 2 at different wavelength (black: 482nm, red:435nm).



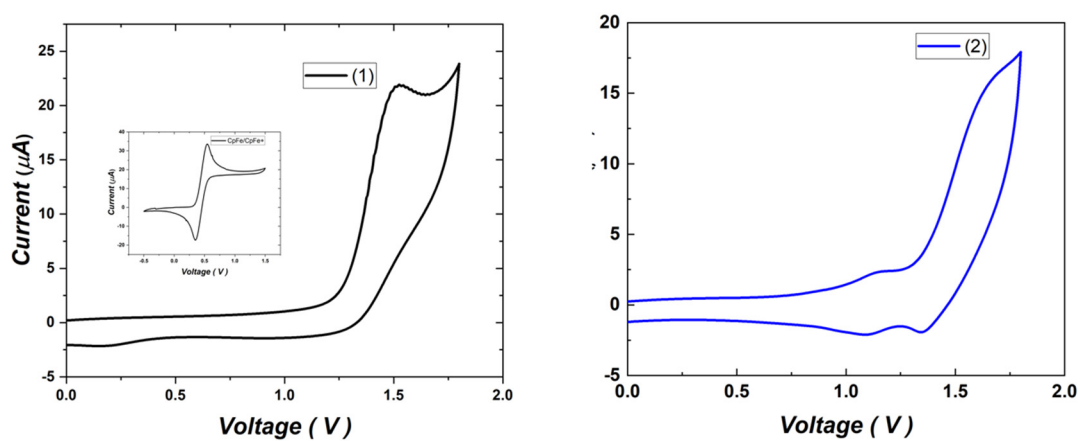

Figure S8. Oxidation of **1** (left) and **2** (right)(inset: Fc/Fc<sup>+</sup> oxidation).

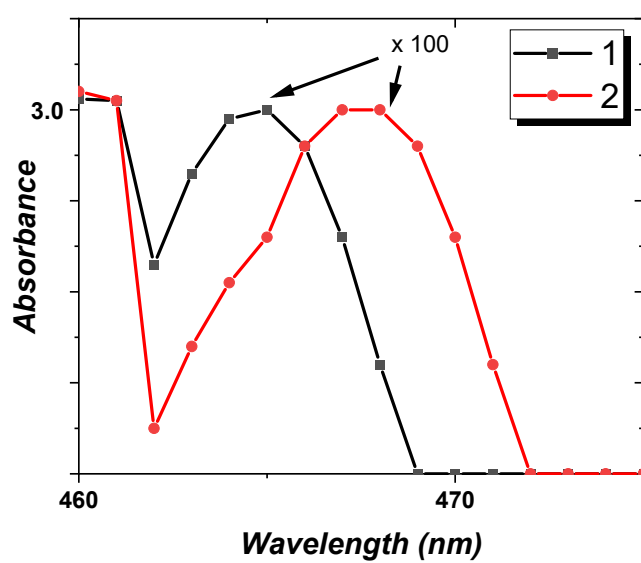

Figure S9. Expanded <sup>3</sup>MLCT absorption band of **1** and **2** at 460 nm ~ 480 nm.



**Table S1. Crystal Data and Structure Refinement for 2.**

|                                   |                                                                                                                                                                                                                                  |                  |
|-----------------------------------|----------------------------------------------------------------------------------------------------------------------------------------------------------------------------------------------------------------------------------|------------------|
| Identification code               | 2                                                                                                                                                                                                                                |                  |
| Empirical formula                 | C <sub>34</sub> H <sub>30</sub> Cl <sub>2</sub> F N <sub>3</sub> O <sub>3</sub> Pt<br>[Pt(C <sub>27</sub> H <sub>24</sub> N <sub>2</sub> OF)(C <sub>6</sub> H <sub>4</sub> NO <sub>2</sub> )]·(CH <sub>2</sub> Cl <sub>2</sub> ) |                  |
| Formula weight                    | 813.60                                                                                                                                                                                                                           |                  |
| Temperature                       | 173(2) K                                                                                                                                                                                                                         |                  |
| Wavelength                        | 0.71073 Å                                                                                                                                                                                                                        |                  |
| Crystal system                    | Monoclinic                                                                                                                                                                                                                       |                  |
| Space group                       | P2 <sub>1</sub> /n                                                                                                                                                                                                               |                  |
| Unit cell dimensions              | a = 11.3734(3) Å                                                                                                                                                                                                                 | = 90°.           |
|                                   | b = 13.4201(4) Å                                                                                                                                                                                                                 | = 101.2050(10)°. |
|                                   | c = 20.8322(6) Å                                                                                                                                                                                                                 | = 90°.           |
| Volume                            | 3119.05(15) Å <sup>3</sup>                                                                                                                                                                                                       |                  |
| Z                                 | 4                                                                                                                                                                                                                                |                  |
| Density (calculated)              | 1.733 Mg/m <sup>3</sup>                                                                                                                                                                                                          |                  |
| Absorption coefficient            | 4.716 mm <sup>-1</sup>                                                                                                                                                                                                           |                  |
| F(000)                            | 1600                                                                                                                                                                                                                             |                  |
| Crystal size                      | 0.298 x 0.222 x 0.093 mm <sup>3</sup>                                                                                                                                                                                            |                  |
| Theta range for data collection   | 1.815 to 28.324°.                                                                                                                                                                                                                |                  |
| Index ranges                      | -15<=h<=15, -17<=k<=17, -27<=l<=27                                                                                                                                                                                               |                  |
| Reflections collected             | 82770                                                                                                                                                                                                                            |                  |
| Independent reflections           | 7757 [R(int) = 0.0293]                                                                                                                                                                                                           |                  |
| Completeness to theta = 25.242°   | 100.0 %                                                                                                                                                                                                                          |                  |
| Absorption correction             | Semi-empirical from equivalents                                                                                                                                                                                                  |                  |
| Max. and min. transmission        | 0.7457 and 0.5114                                                                                                                                                                                                                |                  |
| Refinement method                 | Full-matrix least-squares on F <sup>2</sup>                                                                                                                                                                                      |                  |
| Data / restraints / parameters    | 7757 / 0 / 397                                                                                                                                                                                                                   |                  |
| Goodness-of-fit on F <sup>2</sup> | 1.105                                                                                                                                                                                                                            |                  |
| Final R indices [I>2sigma(I)]     | R1 = 0.0228, wR2 = 0.0547                                                                                                                                                                                                        |                  |
| R indices (all data)              | R1 = 0.0262, wR2 = 0.0561                                                                                                                                                                                                        |                  |
| Extinction coefficient            | n/a                                                                                                                                                                                                                              |                  |
| Largest diff. peak and hole       | 1.090 and -0.469 e.Å <sup>-3</sup>                                                                                                                                                                                               |                  |

**Table S2.** Atomic coordinates ( $\times 10^4$ ) and equivalent isotropic displacement parameters ( $\text{\AA}^2 \times 10^3$ ) for **2**. U(eq) is defined as one third of the trace of the orthogonalized  $U_{ij}$  tensor.

|       | x        | y        | z       | U(eq) |
|-------|----------|----------|---------|-------|
| Pt(1) | 4718(1)  | 5950(1)  | 7676(1) | 27(1) |
| F(1)  | 5305(2)  | 3582(2)  | 5649(1) | 64(1) |
| N(1)  | 5936(2)  | 6996(2)  | 7642(1) | 29(1) |
| N(2)  | 7339(2)  | 7684(2)  | 7212(1) | 32(1) |
| N(3)  | 3413(2)  | 4962(2)  | 7777(1) | 29(1) |
| O(1)  | 11141(2) | 6752(2)  | 6671(1) | 41(1) |
| O(2)  | 4272(2)  | 6497(2)  | 8529(1) | 40(1) |
| O(3)  | 3411(3)  | 5982(2)  | 9341(1) | 67(1) |
| C(1)  | 5348(2)  | 5476(2)  | 6892(1) | 28(1) |
| C(2)  | 5078(3)  | 4622(2)  | 6519(2) | 36(1) |
| C(3)  | 5614(3)  | 4438(2)  | 5990(2) | 40(1) |
| C(4)  | 6434(3)  | 5047(3)  | 5799(2) | 44(1) |
| C(5)  | 6751(3)  | 5899(2)  | 6165(2) | 42(1) |
| C(6)  | 6236(3)  | 6106(2)  | 6707(1) | 32(1) |
| C(7)  | 6533(2)  | 6937(2)  | 7154(1) | 30(1) |
| C(8)  | 6367(3)  | 7800(2)  | 8023(1) | 35(1) |
| C(9)  | 7242(3)  | 8228(2)  | 7761(2) | 34(1) |
| C(10) | 8265(3)  | 7792(2)  | 6830(2) | 35(1) |
| C(11) | 8032(3)  | 8422(2)  | 6273(2) | 40(1) |
| C(12) | 8891(3)  | 8461(2)  | 5880(2) | 41(1) |
| C(13) | 9900(3)  | 7896(2)  | 6044(1) | 36(1) |
| C(14) | 10100(3) | 7299(2)  | 6596(2) | 36(1) |
| C(15) | 9288(3)  | 7225(2)  | 7028(2) | 36(1) |
| C(16) | 10947(3) | 7699(2)  | 5737(2) | 38(1) |
| C(17) | 11317(3) | 8041(3)  | 5170(2) | 48(1) |
| C(18) | 12377(3) | 7667(3)  | 5036(2) | 50(1) |
| C(19) | 13046(3) | 6979(3)  | 5453(2) | 49(1) |
| C(20) | 12678(3) | 6626(3)  | 6010(2) | 45(1) |
| C(21) | 11627(3) | 7006(2)  | 6129(2) | 40(1) |
| C(22) | 6894(4)  | 9012(3)  | 6087(2) | 52(1) |
| C(23) | 6125(5)  | 8628(5)  | 5450(3) | 97(2) |
| C(24) | 7154(5)  | 10116(3) | 6040(3) | 91(2) |
| C(25) | 9496(3)  | 6563(2)  | 7627(2) | 44(1) |

|       |          |         |         |       |
|-------|----------|---------|---------|-------|
| C(26) | 10646(4) | 6821(3) | 8106(2) | 58(1) |
| C(27) | 9477(4)  | 5469(3) | 7435(2) | 60(1) |
| C(28) | 3626(3)  | 5892(2) | 8796(2) | 40(1) |
| C(29) | 3074(2)  | 5042(2) | 8363(1) | 32(1) |
| C(30) | 2219(3)  | 4431(3) | 8541(2) | 40(1) |
| C(31) | 1675(3)  | 3710(2) | 8106(2) | 42(1) |
| C(32) | 1992(3)  | 3643(2) | 7505(2) | 42(1) |
| C(33) | 2849(3)  | 4291(2) | 7354(2) | 39(1) |
| C(34) | 866(4)   | 3565(3) | 5455(2) | 67(1) |
| CI(1) | 2400(1)  | 3734(1) | 5522(1) | 90(1) |
| CI(2) | 222(1)   | 4472(1) | 5892(1) | 83(1) |

---

**Table S3.** Bond lengths [Å] and angles [°] for **2**.

---

|             |          |
|-------------|----------|
| Pt(1)-N(1)  | 1.983(2) |
| Pt(1)-C(1)  | 2.009(3) |
| Pt(1)-N(3)  | 2.032(2) |
| Pt(1)-O(2)  | 2.075(2) |
| F(1)-C(3)   | 1.360(4) |
| N(1)-C(7)   | 1.331(3) |
| N(1)-C(8)   | 1.372(4) |
| N(2)-C(7)   | 1.347(3) |
| N(2)-C(9)   | 1.379(4) |
| N(2)-C(10)  | 1.446(3) |
| N(3)-C(33)  | 1.334(4) |
| N(3)-C(29)  | 1.354(3) |
| O(1)-C(14)  | 1.376(4) |
| O(1)-C(21)  | 1.393(4) |
| O(2)-C(28)  | 1.290(4) |
| O(3)-C(28)  | 1.213(4) |
| C(1)-C(2)   | 1.385(4) |
| C(1)-C(6)   | 1.427(4) |
| C(2)-C(3)   | 1.381(4) |
| C(3)-C(4)   | 1.357(4) |
| C(4)-C(5)   | 1.384(4) |
| C(5)-C(6)   | 1.397(4) |
| C(6)-C(7)   | 1.450(4) |
| C(8)-C(9)   | 1.352(4) |
| C(10)-C(15) | 1.384(4) |
| C(10)-C(11) | 1.420(4) |
| C(11)-C(12) | 1.392(4) |
| C(11)-C(22) | 1.503(5) |
| C(12)-C(13) | 1.362(4) |
| C(13)-C(14) | 1.383(4) |
| C(13)-C(16) | 1.481(4) |
| C(14)-C(15) | 1.413(4) |
| C(15)-C(25) | 1.512(4) |
| C(16)-C(21) | 1.373(5) |
| C(16)-C(17) | 1.407(5) |
| C(17)-C(18) | 1.383(5) |

|             |          |
|-------------|----------|
| C(18)-C(19) | 1.389(5) |
| C(19)-C(20) | 1.391(5) |
| C(20)-C(21) | 1.365(4) |
| C(22)-C(24) | 1.519(6) |
| C(22)-C(23) | 1.531(6) |
| C(25)-C(27) | 1.521(5) |
| C(25)-C(26) | 1.523(5) |
| C(28)-C(29) | 1.514(4) |
| C(29)-C(30) | 1.377(4) |
| C(30)-C(31) | 1.386(5) |
| C(31)-C(32) | 1.373(5) |
| C(32)-C(33) | 1.386(4) |
| C(34)-Cl(1) | 1.737(5) |
| C(34)-Cl(2) | 1.762(5) |

|                  |            |
|------------------|------------|
| N(1)-Pt(1)-C(1)  | 80.44(10)  |
| N(1)-Pt(1)-N(3)  | 174.37(9)  |
| C(1)-Pt(1)-N(3)  | 105.10(10) |
| N(1)-Pt(1)-O(2)  | 93.94(9)   |
| C(1)-Pt(1)-O(2)  | 173.25(10) |
| N(3)-Pt(1)-O(2)  | 80.60(9)   |
| C(7)-N(1)-C(8)   | 108.1(2)   |
| C(7)-N(1)-Pt(1)  | 116.66(18) |
| C(8)-N(1)-Pt(1)  | 135.22(19) |
| C(7)-N(2)-C(9)   | 107.8(2)   |
| C(7)-N(2)-C(10)  | 125.5(2)   |
| C(9)-N(2)-C(10)  | 126.0(2)   |
| C(33)-N(3)-C(29) | 117.7(2)   |
| C(33)-N(3)-Pt(1) | 129.8(2)   |
| C(29)-N(3)-Pt(1) | 112.55(19) |
| C(14)-O(1)-C(21) | 104.3(2)   |
| C(28)-O(2)-Pt(1) | 113.68(19) |
| C(2)-C(1)-C(6)   | 115.4(2)   |
| C(2)-C(1)-Pt(1)  | 130.0(2)   |
| C(6)-C(1)-Pt(1)  | 114.53(19) |
| C(3)-C(2)-C(1)   | 120.8(3)   |
| C(4)-C(3)-F(1)   | 118.5(3)   |
| C(4)-C(3)-C(2)   | 124.1(3)   |

|                   |          |
|-------------------|----------|
| F(1)-C(3)-C(2)    | 117.3(3) |
| C(3)-C(4)-C(5)    | 117.2(3) |
| C(4)-C(5)-C(6)    | 120.3(3) |
| C(5)-C(6)-C(1)    | 122.1(3) |
| C(5)-C(6)-C(7)    | 126.1(3) |
| C(1)-C(6)-C(7)    | 111.8(2) |
| N(1)-C(7)-N(2)    | 109.0(2) |
| N(1)-C(7)-C(6)    | 116.5(2) |
| N(2)-C(7)-C(6)    | 134.4(2) |
| C(9)-C(8)-N(1)    | 108.0(2) |
| C(8)-C(9)-N(2)    | 107.1(2) |
| C(15)-C(10)-C(11) | 125.7(3) |
| C(15)-C(10)-N(2)  | 116.2(3) |
| C(11)-C(10)-N(2)  | 118.0(3) |
| C(12)-C(11)-C(10) | 117.6(3) |
| C(12)-C(11)-C(22) | 119.8(3) |
| C(10)-C(11)-C(22) | 122.6(3) |
| C(13)-C(12)-C(11) | 118.9(3) |
| C(12)-C(13)-C(14) | 121.8(3) |
| C(12)-C(13)-C(16) | 134.3(3) |
| C(14)-C(13)-C(16) | 103.9(3) |
| O(1)-C(14)-C(13)  | 113.7(3) |
| O(1)-C(14)-C(15)  | 123.0(3) |
| C(13)-C(14)-C(15) | 123.2(3) |
| C(10)-C(15)-C(14) | 112.8(3) |
| C(10)-C(15)-C(25) | 123.8(3) |
| C(14)-C(15)-C(25) | 123.4(3) |
| C(21)-C(16)-C(17) | 119.6(3) |
| C(21)-C(16)-C(13) | 105.8(3) |
| C(17)-C(16)-C(13) | 134.6(3) |
| C(18)-C(17)-C(16) | 117.7(3) |
| C(17)-C(18)-C(19) | 120.6(3) |
| C(18)-C(19)-C(20) | 122.1(3) |
| C(21)-C(20)-C(19) | 116.1(3) |
| C(20)-C(21)-C(16) | 123.9(3) |
| C(20)-C(21)-O(1)  | 123.7(3) |
| C(16)-C(21)-O(1)  | 112.4(3) |
| C(11)-C(22)-C(24) | 111.2(3) |



|                   |          |
|-------------------|----------|
| C(11)-C(22)-C(23) | 111.3(4) |
| C(24)-C(22)-C(23) | 111.0(4) |
| C(15)-C(25)-C(27) | 111.0(3) |
| C(15)-C(25)-C(26) | 112.6(3) |
| C(27)-C(25)-C(26) | 111.0(3) |
| O(3)-C(28)-O(2)   | 125.2(3) |
| O(3)-C(28)-C(29)  | 119.8(3) |
| O(2)-C(28)-C(29)  | 114.9(2) |
| N(3)-C(29)-C(30)  | 122.4(3) |
| N(3)-C(29)-C(28)  | 116.0(2) |
| C(30)-C(29)-C(28) | 121.4(3) |
| C(29)-C(30)-C(31) | 119.3(3) |
| C(32)-C(31)-C(30) | 118.6(3) |
| C(31)-C(32)-C(33) | 119.1(3) |
| N(3)-C(33)-C(32)  | 122.9(3) |
| Cl(1)-C(34)-Cl(2) | 112.3(2) |

---

Symmetry transformations used to generate equivalent atoms:

**Table S4.** Anisotropic displacement parameters ( $\text{\AA}^2 \times 10^3$ ) for **2**. The anisotropic displacement factor exponent takes the form:  $-2 \left[ h^2 a^{*2} U^{11} + \dots + 2 h k a^* b^* U^{12} \right]$

|       | $U^{11}$ | $U^{22}$ | $U^{33}$ | $U^{23}$ | $U^{13}$ | $U^{12}$ |
|-------|----------|----------|----------|----------|----------|----------|
| Pt(1) | 25(1)    | 28(1)    | 28(1)    | -2(1)    | 9(1)     | 0(1)     |
| F(1)  | 75(2)    | 54(1)    | 73(1)    | -36(1)   | 45(1)    | -25(1)   |
| N(1)  | 28(1)    | 28(1)    | 33(1)    | -4(1)    | 10(1)    | -1(1)    |
| N(2)  | 31(1)    | 29(1)    | 38(1)    | -2(1)    | 12(1)    | -2(1)    |
| N(3)  | 26(1)    | 30(1)    | 32(1)    | 1(1)     | 9(1)     | 3(1)     |
| O(1)  | 39(1)    | 41(1)    | 43(1)    | 4(1)     | 11(1)    | 4(1)     |
| O(2)  | 42(1)    | 44(1)    | 38(1)    | -12(1)   | 18(1)    | -8(1)    |
| O(3)  | 77(2)    | 93(2)    | 39(1)    | -19(1)   | 29(1)    | -27(2)   |
| C(1)  | 27(1)    | 27(1)    | 31(1)    | 0(1)     | 9(1)     | 2(1)     |
| C(2)  | 34(2)    | 34(1)    | 42(2)    | -5(1)    | 17(1)    | -2(1)    |
| C(3)  | 41(2)    | 37(2)    | 44(2)    | -13(1)   | 16(1)    | -3(1)    |
| C(4)  | 52(2)    | 47(2)    | 40(2)    | -12(1)   | 24(1)    | -9(2)    |
| C(5)  | 46(2)    | 47(2)    | 40(2)    | -8(1)    | 21(1)    | -11(1)   |
| C(6)  | 35(2)    | 32(1)    | 31(1)    | -2(1)    | 10(1)    | -2(1)    |
| C(7)  | 29(1)    | 30(1)    | 32(1)    | 0(1)     | 10(1)    | -1(1)    |
| C(8)  | 34(1)    | 34(1)    | 38(1)    | -6(1)    | 11(1)    | 1(1)     |
| C(9)  | 32(1)    | 28(1)    | 41(2)    | -7(1)    | 8(1)     | 0(1)     |
| C(10) | 34(1)    | 31(1)    | 41(2)    | -4(1)    | 15(1)    | -7(1)    |
| C(11) | 44(2)    | 37(2)    | 42(2)    | -1(1)    | 13(1)    | -7(1)    |
| C(12) | 42(2)    | 41(2)    | 41(2)    | 8(1)     | 8(1)     | -3(1)    |
| C(13) | 36(2)    | 33(1)    | 36(1)    | 1(1)     | 3(1)     | -10(1)   |
| C(14) | 35(2)    | 31(1)    | 40(2)    | -3(1)    | 2(1)     | 1(1)     |
| C(15) | 37(2)    | 29(1)    | 44(2)    | -3(1)    | 12(1)    | -6(1)    |
| C(16) | 33(2)    | 41(2)    | 44(2)    | -12(1)   | 12(1)    | -13(1)   |
| C(17) | 42(2)    | 50(2)    | 51(2)    | -6(2)    | 9(2)     | -8(2)    |
| C(18) | 45(2)    | 58(2)    | 51(2)    | -13(2)   | 22(2)    | -12(2)   |
| C(19) | 40(2)    | 59(2)    | 54(2)    | -16(2)   | 21(2)    | -8(2)    |
| C(20) | 42(2)    | 49(2)    | 47(2)    | -8(2)    | 13(1)    | -3(2)    |
| C(21) | 38(2)    | 45(2)    | 39(2)    | -9(1)    | 12(1)    | -9(1)    |
| C(22) | 51(2)    | 58(2)    | 51(2)    | 15(2)    | 14(2)    | 6(2)     |
| C(23) | 67(3)    | 102(4)   | 106(4)   | -7(4)    | -21(3)   | 11(3)    |
| C(24) | 76(3)    | 48(2)    | 146(5)   | 12(3)    | 12(3)    | 12(2)    |
| C(25) | 40(2)    | 38(2)    | 55(2)    | 5(1)     | 16(2)    | 7(1)     |

|       |        |        |       |       |       |        |
|-------|--------|--------|-------|-------|-------|--------|
| C(26) | 70(3)  | 44(2)  | 53(2) | 2(2)  | -3(2) | 10(2)  |
| C(27) | 59(2)  | 37(2)  | 80(3) | 8(2)  | 3(2)  | -3(2)  |
| C(28) | 38(2)  | 52(2)  | 31(1) | -7(1) | 11(1) | -1(1)  |
| C(29) | 29(1)  | 37(2)  | 31(1) | 5(1)  | 7(1)  | 4(1)   |
| C(30) | 37(2)  | 48(2)  | 37(2) | 15(1) | 11(1) | 4(1)   |
| C(31) | 32(2)  | 38(2)  | 56(2) | 16(1) | 8(1)  | -2(1)  |
| C(32) | 36(2)  | 35(2)  | 57(2) | -5(1) | 10(1) | -2(1)  |
| C(33) | 34(2)  | 41(2)  | 44(2) | -7(1) | 13(1) | -3(1)  |
| C(34) | 79(3)  | 61(3)  | 55(2) | 0(2)  | -2(2) | -30(2) |
| CI(1) | 82(1)  | 124(1) | 66(1) | -8(1) | 23(1) | -34(1) |
| CI(2) | 103(1) | 81(1)  | 71(1) | 13(1) | 29(1) | -4(1)  |

---

**Table S5.** Hydrogen coordinates (  $\times 10^4$ ) and isotropic displacement parameters ( $\text{\AA}^2 \times 10^3$ ) for **2**.

|        | x     | y     | z    | U(eq) |
|--------|-------|-------|------|-------|
| H(2)   | 4517  | 4158  | 6628 | 43    |
| H(4)   | 6775  | 4895  | 5429 | 53    |
| H(5)   | 7322  | 6346  | 6048 | 51    |
| H(8)   | 6098  | 8018  | 8404 | 42    |
| H(9)   | 7703  | 8796  | 7925 | 40    |
| H(12)  | 8775  | 8875  | 5503 | 50    |
| H(17)  | 10854 | 8513  | 4888 | 57    |
| H(18)  | 12650 | 7883  | 4656 | 59    |
| H(19)  | 13779 | 6743  | 5355 | 59    |
| H(20)  | 13131 | 6149  | 6292 | 54    |
| H(22)  | 6424  | 8922  | 6442 | 63    |
| H(23A) | 5390  | 9025  | 5342 | 145   |
| H(23B) | 6576  | 8684  | 5095 | 145   |
| H(23C) | 5916  | 7928  | 5503 | 145   |
| H(24A) | 6398  | 10482 | 5919 | 137   |
| H(24B) | 7591  | 10356 | 6464 | 137   |
| H(24C) | 7642  | 10223 | 5707 | 137   |
| H(25)  | 8815  | 6675  | 7858 | 52    |
| H(26A) | 10740 | 6373  | 8484 | 87    |
| H(26B) | 11332 | 6744  | 7890 | 87    |
| H(26C) | 10606 | 7512  | 8253 | 87    |
| H(27A) | 9614  | 5056  | 7830 | 90    |
| H(27B) | 8695  | 5305  | 7165 | 90    |
| H(27C) | 10109 | 5341  | 7186 | 90    |
| H(30)  | 2004  | 4503  | 8957 | 48    |
| H(31)  | 1094  | 3272  | 8222 | 50    |
| H(32)  | 1630  | 3160  | 7196 | 51    |
| H(33)  | 3043  | 4254  | 6931 | 47    |
| H(34A) | 717   | 2896  | 5623 | 81    |
| H(34B) | 474   | 3593  | 4988 | 81    |

**Table S6.** Hydrogen bonds for **2** [ $\text{\AA}$  and  $^\circ$ ].

| D-H...A               | d(D-H) | d(H...A) | d(D...A) | $\angle(\text{DHA})$ |
|-----------------------|--------|----------|----------|----------------------|
| C(4)-H(4)...Cl(1)#1   | 0.95   | 2.99     | 3.665(3) | 129.6                |
| C(33)-H(33)...Cl(1)   | 0.95   | 2.97     | 3.823(3) | 150.7                |
| C(34)-H(34A)...O(2)#2 | 0.99   | 2.58     | 3.512(5) | 157.6                |

Symmetry transformations used to generate equivalent atoms:

#1  $-x+1, -y+1, -z+1$       #2  $-x+1/2, y-1/2, -z+3/2$

**Table S7.** TD-DFT calculation results of **1** and **2**.

|          | Transition            | $\lambda/E$<br>(nm/eV) | f      | MO                      | CI     | %    | MLCT(%) |
|----------|-----------------------|------------------------|--------|-------------------------|--------|------|---------|
| <b>1</b> | $S_0 \rightarrow S_1$ | 355.02/3.4924          | 0.0031 | HOMO $\rightarrow$ LUMO | 0.6926 | 95.9 | 36.6    |
|          | $S_0 \rightarrow T_1$ | 422.52/2.9344          |        | HOMO $\rightarrow$ LUMO | 0.6101 | 74.4 |         |
| <b>2</b> | $S_0 \rightarrow S_1$ | 414.65/2.9901          | 0.0054 | HOMO $\rightarrow$ LUMO | 0.6883 | 94.8 | 43.1    |
|          | $S_0 \rightarrow T_1$ | 443.81/2.7937          |        | HOMO $\rightarrow$ LUMO | 0.6478 | 83.9 |         |

**Table S8.** PHOLEDs data of **1**-based devices at different doping levels.

| Doping %         | Voltage(V)<br>at 1000<br>cd/m <sup>2</sup> | Max<br>EQE(%) | At 100 cd/m <sup>2</sup> |         |           | At 1000 cd/m <sup>2</sup> |           |           |
|------------------|--------------------------------------------|---------------|--------------------------|---------|-----------|---------------------------|-----------|-----------|
|                  |                                            |               | CIE (x, y)               | EQE (%) | CE (cd/A) | EQE (%)                   | CE (cd/A) | PE (lm/W) |
| 3%               | 5.9                                        | 8.2           | (0.19, 0.32)             | 6.5     | 13.6      | 4.3                       | 8.7       | 4.6       |
| 10%              | 5.9                                        | 10.4          | (0.19, 0.34)             | 8.4     | 18.0      | 5.4                       | 11.5      | 10.4      |
| Reference<br>10% | 5.7                                        | 9.7           | (0.19, 0.37)             | 9.5     | 21.7      | 7.0                       | 15.8      | 8.8       |

Device structure: PEDOT(40nm) /TAPC(10nm)/mCP(10nm)/mCBP:CNmCBPCN;Pt(25nm:x%:Pt)/TSPO1(5nm) /TPBi(20nm) /LiF(1.5nm) /Al(200nm).  
 CE: Current Efficiency; PE:Power efficiency; EQE: External Quantum Efficiency. Reference: Pt(tpim)(O<sup>^</sup>O).
